# Supplementary material for: The Transcription Factor VpxlnR Is Required for the Growth, Development, and Virulence of the Fungal Pathogen Valsa pyri
Source: Frontiers journal article supplement (doi:10.3389/fmicb.2022.784686), 2022-03-03
Supplement: Table_2.xlsx [file Table_2.xlsx]

## Sheet: Sheet1
TABLE S2 COG annotation of the target genes
Gene ID	COG No.	COG class	annotation
VP1G_08403	COG0430	A	RNA 3'-terminal phosphate cyclase									A	RNA processing and modification
VP1G_06896	COG0123	BQ	Acetoin utilization deacetylase AcuC or a related deacetylase									B	Chromatin structure and dynamics
VP1G_01372	COG0282	C	Acetate kinase									C	Energy production and conversion
VP1G_02137	COG0277	C	FAD/FMN-containing dehydrogenase									D	Cell cycle control, cell division, chromosome partitioning
VP1G_03191	COG1584	C	Succinate-acetate transporter protein									E	Amino acid transport and metabolism
VP1G_03506	COG0644	C	Dehydrogenase (flavoprotein)									F	Nucleotide transport and metabolism
VP1G_09185	COG4106	C	Trans-aconitate methyltransferase									G	Carbohydrate transport and metabolism
VP1G_03132	COG5274	CI	Cytochrome b involved in lipid metabolism									H	Coenzyme transport and metabolism
VP1G_03302	COG1304	CIR	FMN-dependent dehydrogenase,									I	Lipid transport and metabolism
VP1G_06301	COG0308	E	Aminopeptidase N									J	Translation, ribosomal structure and biogenesis
VP1G_06508	COG0624	E	Acetylornithine deacetylase									K	Transcription
VP1G_06880	COG0531	E	Amino acid transporter									L	Replication, recombination and repair
VP1G_06889	COG0531	E	Amino acid transporter									M	Cell wall/membrane/envelope biogenesis
VP1G_07699	COG0141	E	Histidinol dehydrogenase									N	Cell motility
VP1G_08557	COG0520	E	Selenocysteine lyase/Cysteine desulfurase									O	Posttranslational modification, protein turnover, chaperones
VP1G_10039	COG0405	E	Gamma-glutamyltranspeptidase									P	Inorganic ion transport and metabolism
VP1G_10411	COG0626	E	Cystathionine beta-lyase/cystathionine gamma-synthase									Q	Secondary metabolites biosynthesis, transport and catabolism
VP1G_10184	COG0504	F	CTP synthase (UTP-ammonia lyase)									R	General function prediction only
VP1G_03226	COG1953	FH	Cytosine/uracil/thiamine/allantoin permease									S	Function unknown
VP1G_01321	COG5309	G	Exo-beta-1,3-glucanase, GH17 family									T	Signal transduction mechanisms
VP1G_01382	COG2273	G	Beta-glucanase, GH16 family									U	Intracellular trafficking, secretion, and vesicular transport
VP1G_01799	COG1472	G	Periplasmic beta-glucosidase and related glycosidases									V	Defense mechanisms
VP1G_01960	COG2814	G	Predicted arabinose efflux permease, MFS family									W	Extracellular structures
VP1G_01970	COG1085	G	Galactose-1-phosphate uridylyltransferase									X	Mobilome: prophages, transposons
VP1G_02061	COG1819	G	UDP:flavonoid glycosyltransferase YjiC, YdhE family									Y	Nuclear structure
VP1G_02838	COG2814	G	Predicted arabinose efflux permease, MFS family									Z	Cytoskeleton
VP1G_02922	COG3408	G	Glycogen debranching enzyme (alpha-1,6-glucosidase)
VP1G_03034	COG5297	G	Cellulase/cellobiase CelA1
VP1G_03881	COG2730	G	Aryl-phospho-beta-D-glucosidase BglC, GH1 family
VP1G_04944	COG2271	G	Sugar phosphate permease
VP1G_04973	COG3534	G	Alpha-L-arabinofuranosidase
VP1G_05358	COG0406	G	Broad specificity phosphatase PhoE
VP1G_06369	COG1501	G	Alpha-glucosidase, glycosyl hydrolase family GH31
VP1G_06437	COG3408	G	Glycogen debranching enzyme (alpha-1,6-glucosidase)
VP1G_07144	COG0296	G	1,4-alpha-glucan branching enzyme
VP1G_07404	COG3325	G	Chitinase, GH18 family
VP1G_07645	COG0033	G	Phosphoglucomutase
VP1G_07869	COG2271	G	Sugar phosphate permease
VP1G_09521	COG1472	G	Periplasmic beta-glucosidase and related glycosidases
VP1G_03513	COG0477	GEPR	MFS family permease
VP1G_04173	COG2154	H	Pterin-4a-carbinolamine dehydratase
VP1G_10349	COG1011	H	FMN phosphatase YigB, HAD superfamily
VP1G_00002	COG0654	HC	2-polyprenyl-6-methoxyphenol hydroxylase and related FAD-dependent oxidoreductases
VP1G_02336	COG0654	HC	2-polyprenyl-6-methoxyphenol hydroxylase and related FAD-dependent oxidoreductases
VP1G_09520	COG0654	HC	2-polyprenyl-6-methoxyphenol hydroxylase and related FAD-dependent oxidoreductases
VP1G_05822	COG0661	HT	unusual protein kinase regulating ubiquinone biosynthesis, AarF/ABC1/UbiB family
VP1G_02760	COG3255	I	Putative sterol carrier protein
VP1G_03215	COG1257	I	Hydroxymethylglutaryl-CoA reductase
VP1G_03830	COG2272	I	Carboxylesterase type B
VP1G_04808	COG4281	I	Acyl-CoA-binding protein
VP1G_05632	COG5379	I	S-adenosylmethionine:diacylglycerol 3-amino-3-carboxypropyl transferase
VP1G_06319	COG1075	I	Triacylglycerol esterase/lipase EstA, alpha/beta hydrolase fold
VP1G_06386	COG2267	I	Lysophospholipase, alpha-beta hydrolase superfamily
VP1G_08059	COG0204	I	1-acyl-sn-glycerol-3-phosphate acyltransferase
VP1G_00359	COG0236	IQ	Acyl carrier protein
VP1G_07453	COG0236	IQ	Acyl carrier protein
VP1G_08628	COG0236	IQ	Acyl carrier protein
VP1G_00921	COG1028	IQR	NAD(P)-dependent dehydrogenase, short-chain alcohol dehydrogenase family
VP1G_05908	COG1028	IQR	NAD(P)-dependent dehydrogenase, short-chain alcohol dehydrogenase family
VP1G_06866	COG1028	IQR	NAD(P)-dependent dehydrogenase, short-chain alcohol dehydrogenase family
VP1G_07293	COG1028	IQR	NAD(P)-dependent dehydrogenase, short-chain alcohol dehydrogenase family
VP1G_02696	COG2303	IR	Choline dehydrogenase or related flavoprotein
VP1G_03613	COG2303	IR	Choline dehydrogenase or related flavoprotein
VP1G_01352	COG0042	J	tRNA-dihydrouridine synthase
VP1G_02179	COG0731	J	Wyosine [tRNA(Phe)-imidazoG37] synthetase, radical SAM superfamily
VP1G_02395	COG1643	J	HrpA-like RNA helicase
VP1G_02851	COG0724	J	RNA recognition motif (RRM) domain
VP1G_04513	COG0090	J	Ribosomal protein L2
VP1G_05216	COG0103	J	Ribosomal protein S9
VP1G_05248	COG1163	J	Ribosome-interacting GTPase 1
VP1G_05442	COG0042	J	tRNA-dihydrouridine synthase
VP1G_05537	COG0532	J	Translation initiation factor IF-2, a GTPase
VP1G_05734	COG0481	J	Translation elongation factor EF-4, membrane-bound GTPase
VP1G_08591	COG2007	J	Ribosomal protein S8E
VP1G_09854	COG1341	J	Polynucleotide 5'-kinase, involved in rRNA processing
VP1G_10041	COG0216	J	Protein chain release factor A
VP1G_05599	COG1670	JO	Protein N-acetyltransferase, RimJ/RimL family
VP1G_07536	COG1418	JR	HD superfamily phosphodieaserase, includes HD domain of RNase Y
VP1G_01272	COG1594	K	DNA-directed RNA polymerase, subunit M/Transcription elongation factor TFIIS
VP1G_04527	COG5164	K	Transcription elongation factor
VP1G_05644	COG0086	K	DNA-directed RNA polymerase, beta' subunit/160 kD subunit
VP1G_06815	COG4886	K	Leucine-rich repeat (LRR) protein
VP1G_04949	COG0553	KL	Superfamily II DNA or RNA helicase, SNF2 family
VP1G_00743	COG0513	L	Superfamily II DNA and RNA helicase
VP1G_01698	COG0513	L	Superfamily II DNA and RNA helicase
VP1G_01747	COG0514	L	Superfamily II DNA helicase RecQ
VP1G_02574	COG1241	L	DNA replicative helicase MCM subunit Mcm2, Cdc46/Mcm family
VP1G_04505	COG0249	L	DNA mismatch repair ATPase MutS
VP1G_06557	COG1793	L	ATP-dependent DNA ligase
VP1G_07020	COG4294	L	UV DNA damage repair endonuclease
VP1G_07442	COG1793	L	ATP-dependent DNA ligase
VP1G_07060	COG3064	M	Membrane protein involved in colicin uptake
VP1G_08925	COG4305	M	Peptidoglycan-binding domain, expansin
VP1G_09645	COG0464	MDT	AAA+-type ATPase, SpoVK/Ycf46/Vps4 family
VP1G_07089	COG1192	N	Cellulose biosynthesis protein BcsQ
VP1G_00480	COG2761	O	Predicted dithiol-disulfide isomerase, DsbA family
VP1G_00963	COG2234	O	Zn-dependent amino- or carboxypeptidase, M28 family
VP1G_01331	COG0638	O	20S proteasome, alpha and beta subunits
VP1G_03398	COG1999	O	Cytochrome oxidase Cu insertion factor, SCO1/SenC/PrrC family
VP1G_05486	COG2234	O	Zn-dependent amino- or carboxypeptidase, M28 family
VP1G_08985	COG5078	O	Ubiquitin-protein ligase
VP1G_09213	COG3118	O	Negative regulator of GroEL, contains thioredoxin-like and TPR-like domains
VP1G_09736	COG3346	O	Cytochrome oxidase assembly protein ShyY1
VP1G_10197	COG0740	O	ATP-dependent protease ClpP, protease subunit
VP1G_10318	COG0459	O	Chaperonin GroEL (HSP60 family)
VP1G_00730	COG2217	P	Cation transport ATPase
VP1G_02704	COG0605	P	Superoxide dismutase
VP1G_03906	COG2223	P	Nitrate/nitrite transporter NarK
VP1G_08949	COG1218	P	3'-Phosphoadenosine 5'-phosphosulfate (PAPS) 3'-phosphatase
VP1G_00989	COG3508	Q	Homogentisate 1,2-dioxygenase
VP1G_03783	COG3670	Q	Carotenoid cleavage dioxygenase or a related enzyme
VP1G_05860	COG0412	Q	Dienelactone hydrolase
VP1G_07386	COG3315	Q	O-Methyltransferase involved in polyketide biosynthesis
VP1G_07729	COG3527	Q	Alpha-acetolactate decarboxylase
VP1G_08122	COG3491	Q	Isopenicillin N synthase and related dioxygenases
VP1G_08368	COG1020	Q	Non-ribosomal peptide synthetase component F
VP1G_01133	COG2124	QV	Cytochrome P450
VP1G_01279	COG2124	QV	Cytochrome P450
VP1G_06754	COG2124	QV	Cytochrome P450
VP1G_00841	COG1672	R	Predicted ATPase, archaeal AAA+ ATPase superfamily
VP1G_01660	COG0667	R	Predicted oxidoreductase (related to aryl-alcohol dehydrogenase)
VP1G_01933	COG5307	R	Guanine-nucleotide exchange factor, contains Sec7 domain
VP1G_02203	COG2319	R	WD40 repeat
VP1G_02926	COG4122	R	Predicted O-methyltransferase YrrM
VP1G_03286	COG1100	R	GTPase SAR1 family domain
VP1G_03794	COG3391	R	DNA-binding beta-propeller fold protein YncE
VP1G_03981	COG1485	R	Predicted ATPase
VP1G_05247	COG2319	R	WD40 repeat
VP1G_05520	COG1672	R	Predicted ATPase, archaeal AAA+ ATPase superfamily
VP1G_07876	COG0667	R	Predicted oxidoreductase (related to aryl-alcohol dehydrogenase)
VP1G_08120	COG2907	R	Predicted NAD/FAD-binding protein
VP1G_08499	COG3173	R	Predicted kinase, aminoglycoside phosphotransferase (APT) family
VP1G_08696	COG0400	R	Predicted esterase
VP1G_08900	COG3573	R	Predicted oxidoreductase
VP1G_10160	COG5258	R	GTPase
VP1G_04945	COG5579	S	Uncharacterized protein, DUF1810 family
VP1G_07397	COG3812	S	Uncharacterized protein
VP1G_08939	COG3291	S	PKD repeat
VP1G_02856	COG0515	T	Serine/threonine protein kinase
VP1G_03128	COG0515	T	Serine/threonine protein kinase
VP1G_03516	COG0515	T	Serine/threonine protein kinase
VP1G_03782	COG1409	T	3',5'-cyclic AMP phosphodiesterase CpdA
VP1G_04075	COG0515	T	Serine/threonine protein kinase
VP1G_04345	COG0515	T	Serine/threonine protein kinase
VP1G_10966	COG0515	T	Serine/threonine protein kinase
VP1G_08162	COG0630	U	Type IV secretory pathway ATPase VirB11/Archaellum biosynthesis ATPase
VP1G_01154	COG1680	V	CubicO group peptidase, beta-lactamase class C family
VP1G_08196	COG1275	V	Tellurite resistance protein TehA and related permeases
